# Supplementary material for: A Pt/Al2O3-supported metal–organic framework film as the size-selective core–shell hydrogenation catalyst
Source: Royal Society of Chemistry journal article supplement (doi:10.1039/c6cc03096c), 2016-01-01
Supplement: c6cc03096c1.pdf [file c6cc03096c1.pdf]

# **Pt/Al<sub>2</sub>O<sub>3</sub>-supported Metal-Organic Framework Film as Size-Selective Core-Shell Hydrogenation Catalyst**

Sonia Aguado, Sawsan El-Jamal, Frederic Meunier, Jerome Canivet and David Farrusseng

## **Supporting Information**

|                                        |   |
|----------------------------------------|---|
| 1. Synthesis of SIM-1 .....            | 2 |
| 2. Powder X-Ray analysis .....         | 2 |
| 3. Gas sorption analysis.....          | 2 |
| 4. SEM-EDS analysis .....              | 4 |
| 5. Hydrogenation catalytic tests ..... | 6 |

## 1. Synthesis of SIM-1

### Synthesis of SIM-1 powder

In a typical synthesis a solid mixture of 0.71 g (2.73 mmol) of  $\text{Zn}(\text{NO}_3)_2 \cdot 4\text{H}_2\text{O}$  and 1.20 g (10.94 mmol) of 4-methyl-5-imidazolecarboxaldehyde is dissolved in 20 ml of DMF.

Afterwards the solution is poured into a vial and heated in an oven at 358 K for 72 h. After the synthesis, the resulting powder is washed 3 times with DMF then with EtOH. The samples are dried at 358K for 3h and then overnight under vacuum at room temperature.

### SIM-1@Pt/ $\text{Al}_2\text{O}_3$ film synthesis

Around 20 beads were immersed in a vial containing 0.71 g (2.73 mmol) of  $\text{Zn}(\text{NO}_3)_2 \cdot 4\text{H}_2\text{O}$  and 1.20 g (10.94 mmol) of 4-methyl-5-imidazolecarboxaldehyde dissolved in 20 ml of DMF. After a solvothermal treatment at 358 K for 48 h, the resulting supported material was washed with ethanol to remove unreacted precursors and fine SIM-1 unsupported particles. The SIM-1 supported on beads is then dried at room temperature.

## 2. Powder X-Ray analysis

The XRD measurements on the materials were carried out by powder X-Ray diffraction (PXRD) using a Bruker D5005 Diffractometer equipped with a secondary graphite monochromator ( $\text{CuK}\alpha$  radiation, wavelengths  $\lambda = 0.154178$  nm) and a scintillation counter. The XRD studies were done at room temperature.

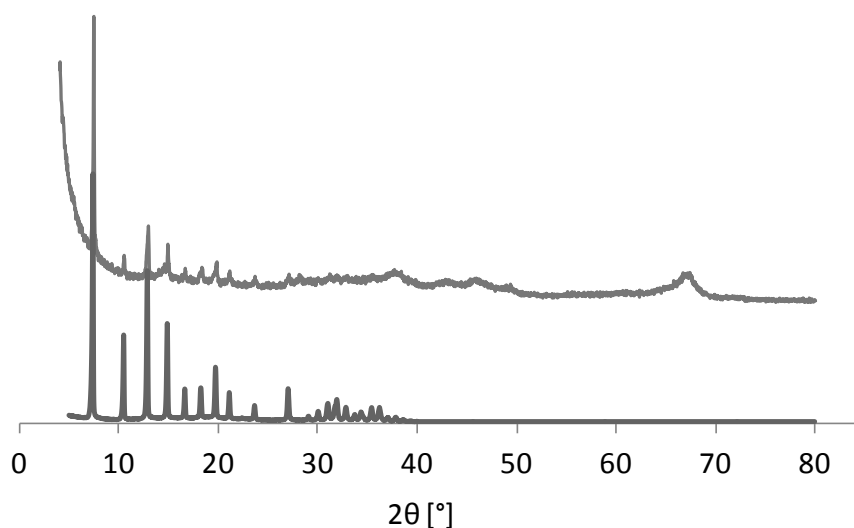

**Figure S1:** XRD patterns of as-synthesized SIM-1 (bottom) and crushed Pt/alumina beads-supported SIM-1 (top).

## 3. Gas sorption analysis

The  $\text{N}_2$  adsorption isotherms at 77 K were measured on a BELSORP-MINI. The samples were outgassed under vacuum ( $\sim 10^{-4}$  mbar) at 473K for 12 h before start of the measurements.

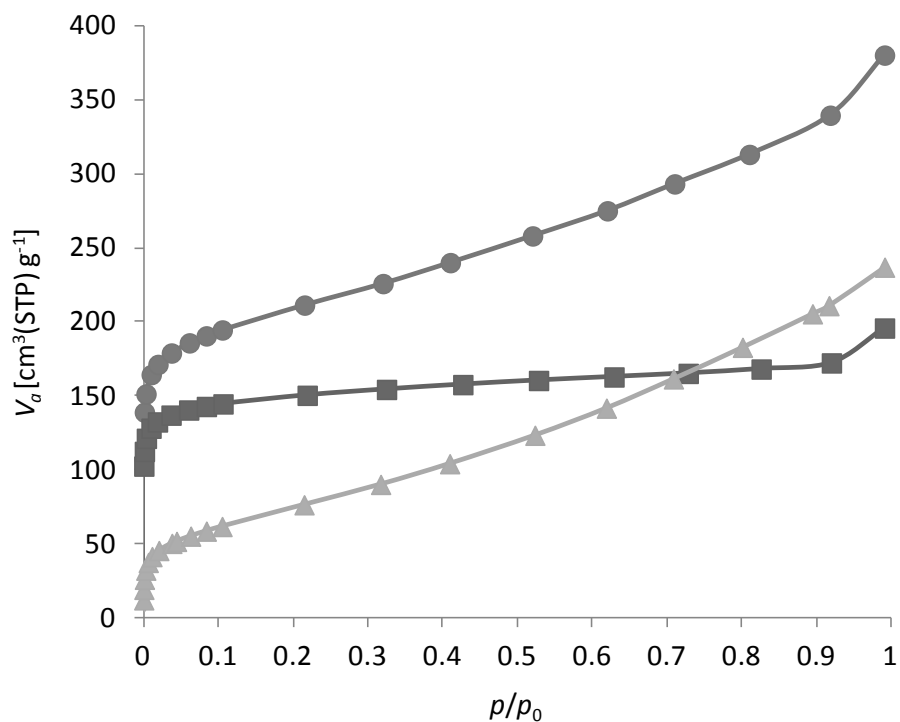

**Figure S2.** Nitrogen adsorption isotherms (77 K) of Pt/Al<sub>2</sub>O<sub>3</sub> beads (bottom), SIM-1 powder (middle) and SIM-1@Pt/Al<sub>2</sub>O<sub>3</sub> beads (top).

The C<sub>2</sub>H<sub>4</sub> adsorption isotherm at 303 K was measured on a BELSORP-MINI. The samples were outgassed under vacuum ( $\sim 10^{-4}$  mbar) at 473K for 12 h before start of the measurements.

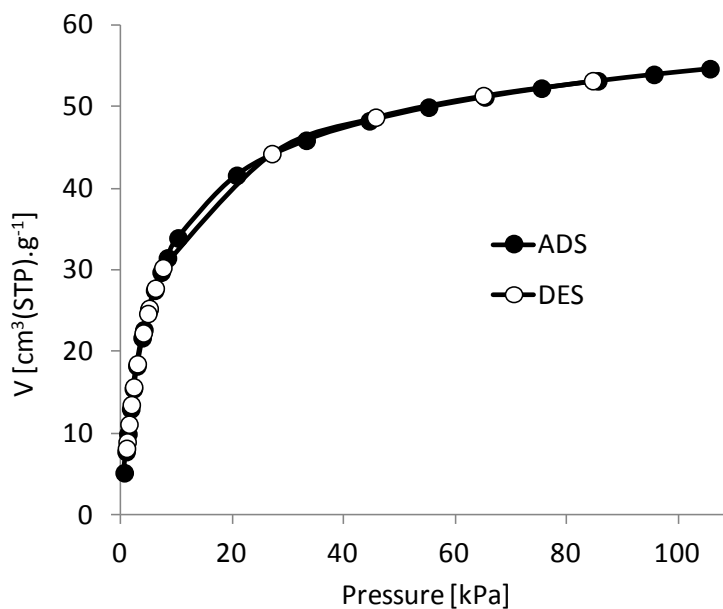

**Figure S3.** Ethylene isotherm (303 K) measured for SIM-1@Pt/Al<sub>2</sub>O<sub>3</sub> beads.

#### 4. SEM-EDS analysis

The surface and cross-section morphology of the as-synthesized supported samples were examined by scanning electron microscopy (SEM) using a JSM 5800LV (JEOL), coupled to an analysis system by energy dispersion spectrometry (EDS) with a diode Si-Li (PGT). The tension range is 0.3-30 kV and the effective resolution is 0.5 nm at 30kV.

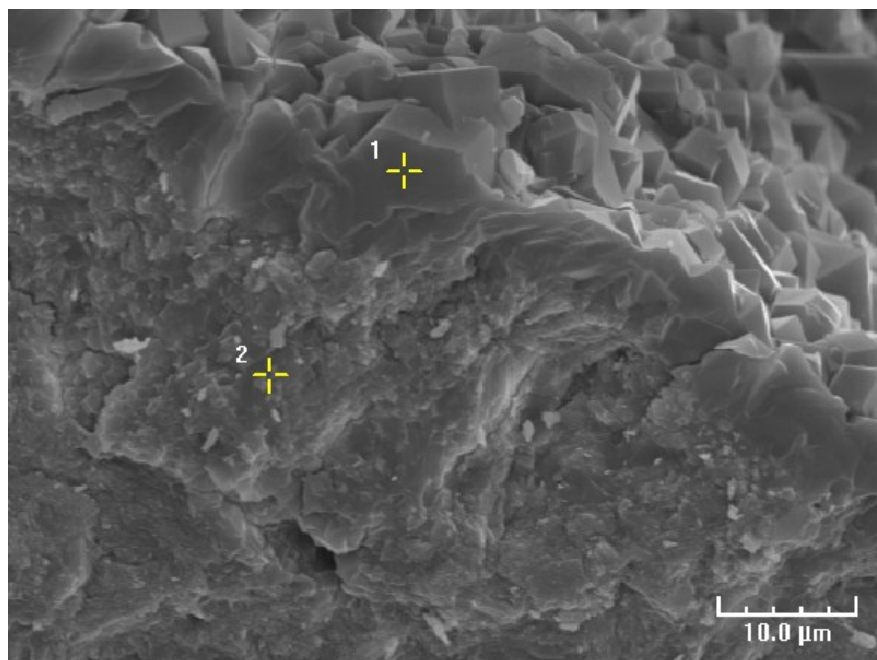

Figure S4. SEM photograph of the cross-section of SIM-1@Pt/Al<sub>2</sub>O<sub>3</sub> bead.

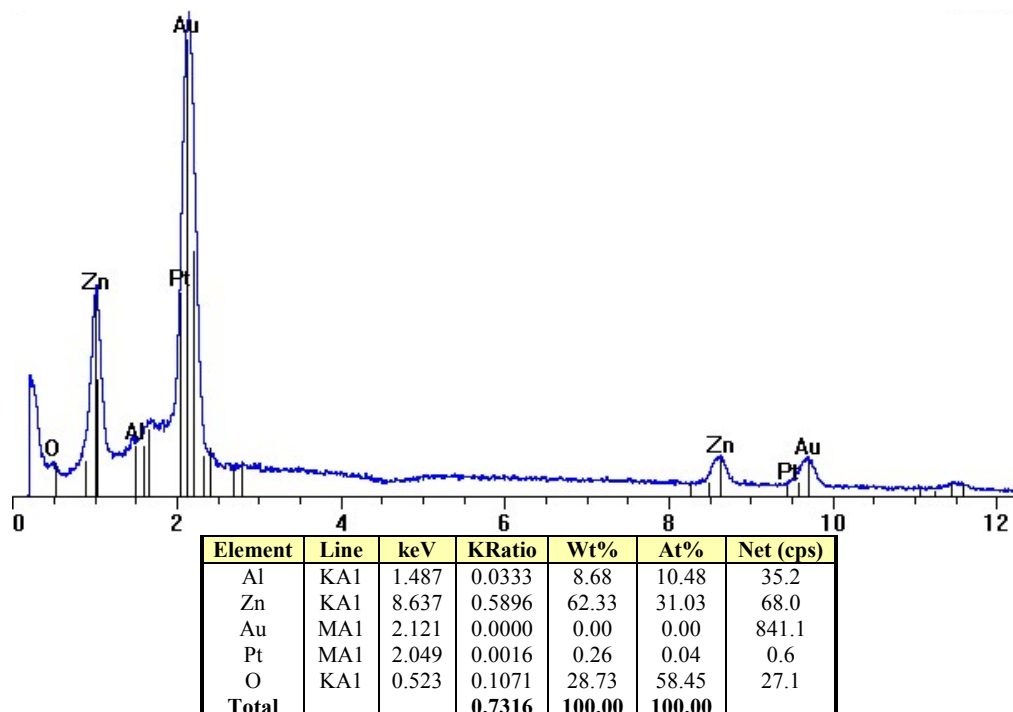

Figure S5. EDS analysis on position 1 in Fig.S4

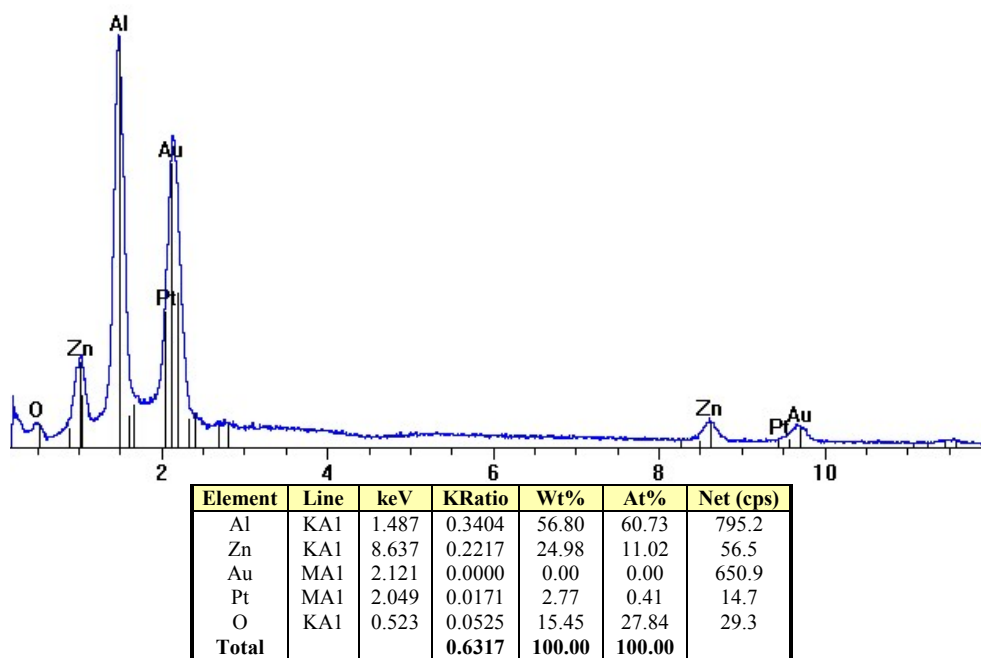

Figure S6. EDS analysis on position 2 in Fig.S4

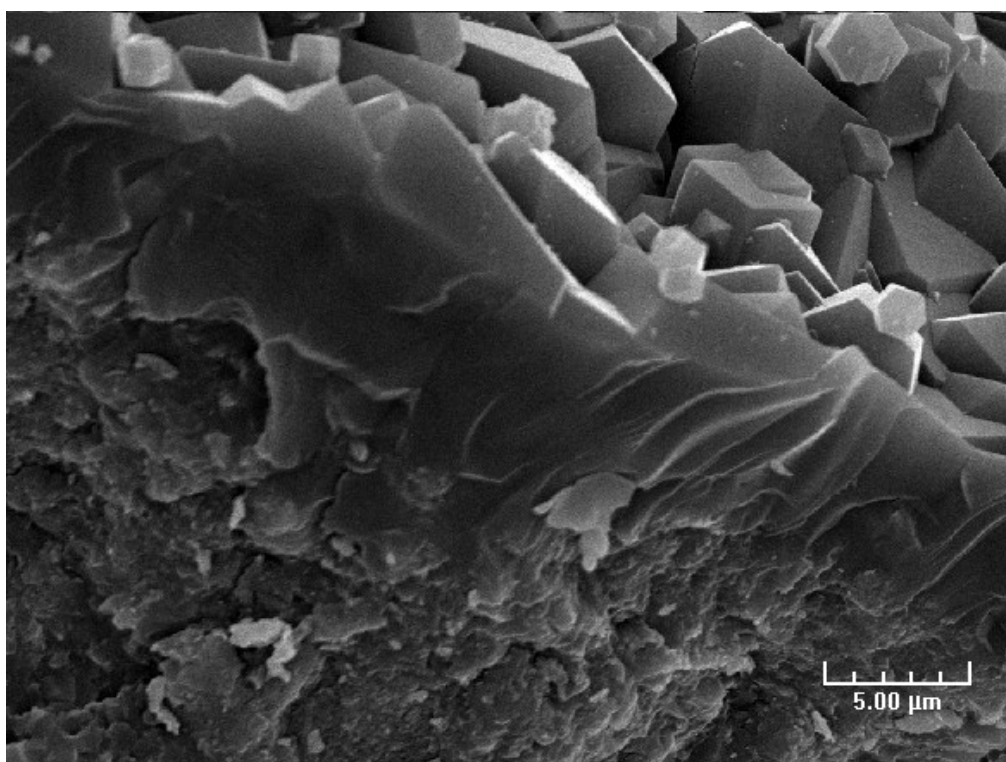

Figure S7. Close view of the cross-section of SIM-1@Pt/Al<sub>2</sub>O<sub>3</sub> bead surface.

## 5. Hydrogenation catalytic tests

Toluene and ethylene hydrogenation tests were carried out using a tubular quartz plug flow reactor (internal diameter 4 mm) placed in a tubular furnace.  $50 \pm 3$  mg of catalysts were used and 16 mg were used for the pure MOF powder, held between quartz wool plugs. This accounted for about 6 to 8 catalyst beads, of about 2 mm diameter each.

The samples were reduced at  $150^\circ\text{C}$  under pure flowing  $\text{H}_2$  before reactions, which were carried out at atmospheric pressure. Toluene was fed using a saturator kept at  $0^\circ\text{C}$ , leading to a partial pressure of 912 Pa. 20 mL/min of pure hydrogen was used as carrier gas and fed through the toluene saturator. The vol.% of toluene was 0.9 %. In the case of ethylene reaction, a 5 vol.%  $\text{C}_2\text{H}_4/\text{H}_2$  feed was used, with a total flow rate of 20 mL/min.

The reactants and reaction products were analysed by FT-IR spectroscopy using a 10 cm path-length gas cell fitted in a Bruker Tensor 27 FT-IR spectrophotometer. The proportion of the reactant and the corresponding saturated product were determined through integration of various spectral regions and calibration curves. For each temperature screened, the measure was performed waiting for steady-state conversion at least 20 min. In the case of toluene, methylcyclohexane was the only product observed, while ethane was the only product obtained in the case of ethylene conversion.

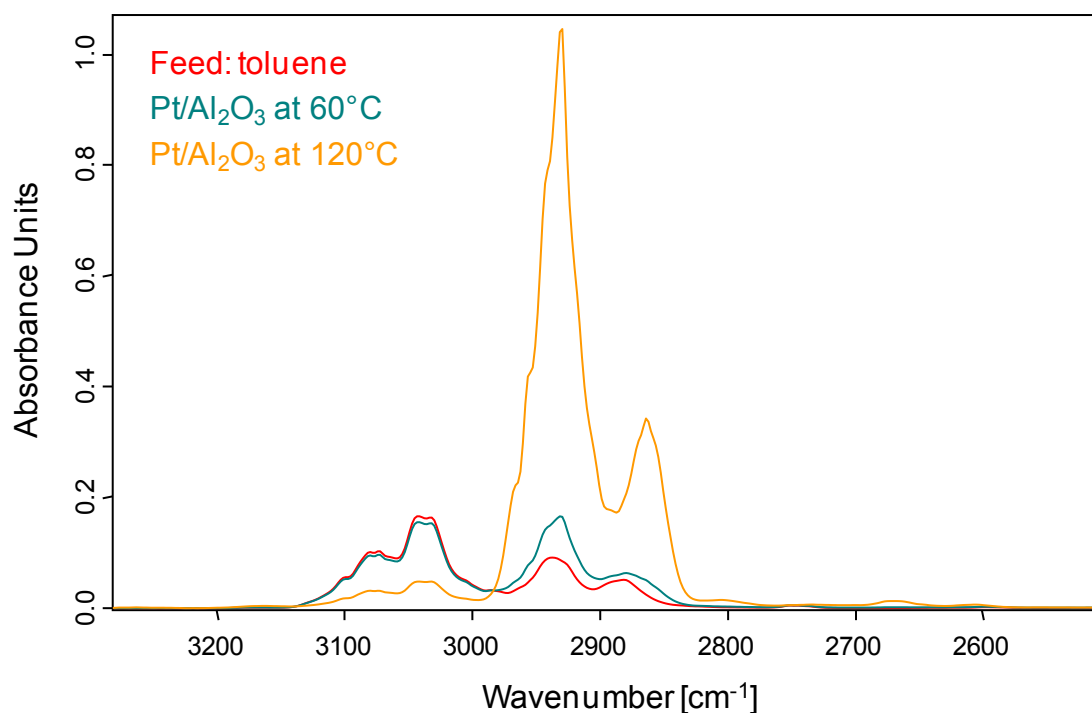

**Figure S8.** Typical FT-IR spectra obtained for toluene hydrogenation analysis

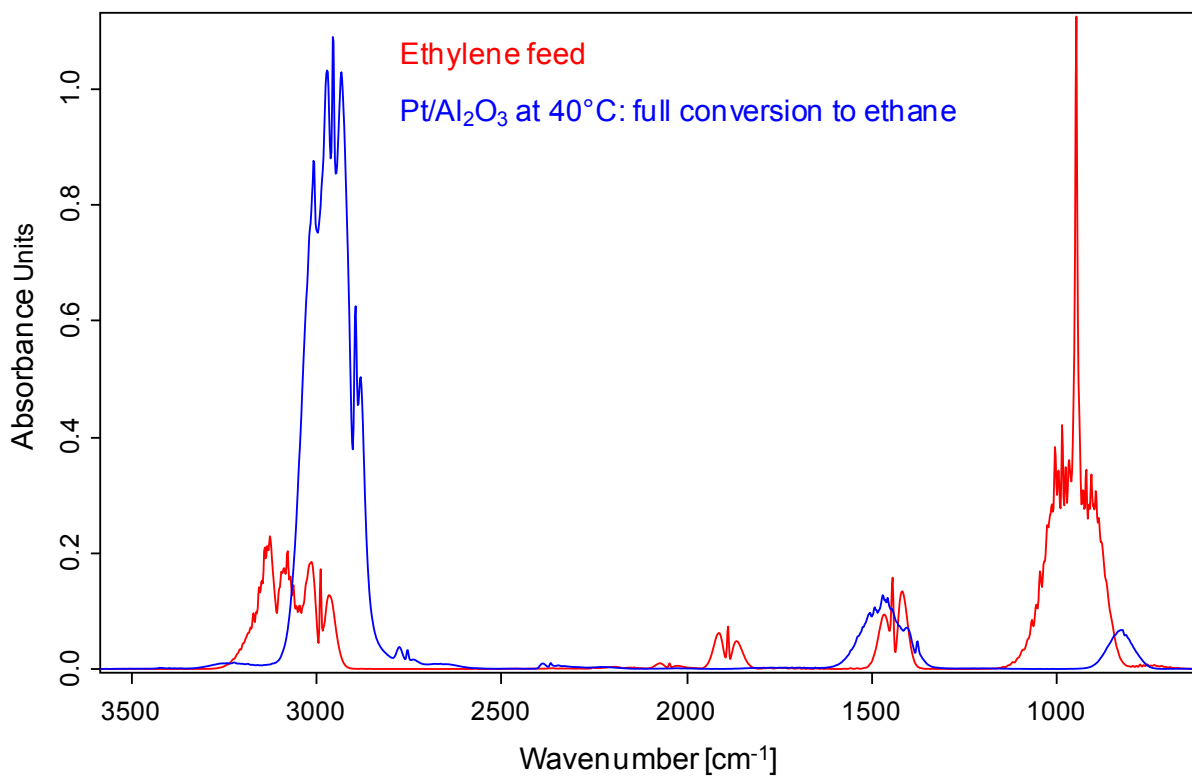

**Figure S9.** Typical FT-IR spectra obtained for ethylene hydrogenation analysis
